# Supplementary material for: The Ras GTPase-Activating Protein Rasal3 Supports Survival of Naive T Cells
Source: PubMed Central journal article supplement (PMC4368693; doi:10.1371/journal.pone.0119898), 2015-03-20
Supplement: pone.0119898.s001.pdf [file pone.0119898.s001.pdf]

Supporting Information 1 Muro et al.

A

489 a.a.

Rasa3 L R F F A P A I L S

Rasal3 L R L L C P A I L A

641 a.a.

B

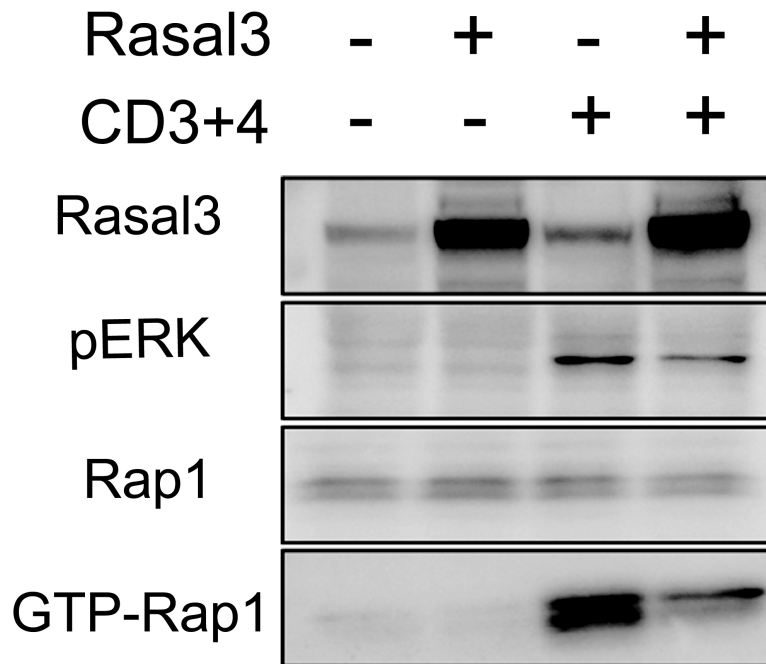

(A) Comparison of amino acid sequence between Rasa3 and Rasal3. (B) Analysis of Rasal3 Rap1GAP function. A Rasa3 overexpressing DPK cell line was used for affinity precipitation assay of GTP-Rap1. The results are representative of more than three independent experiments.
