# Supplementary material for: The Ras GTPase-Activating Protein Rasal3 Supports Survival of Naive T Cells
Source: PubMed Central journal article supplement (PMC4368693; doi:10.1371/journal.pone.0119898), 2015-03-20
Supplement: pone.0119898.s002.pdf [file pone.0119898.s002.pdf]

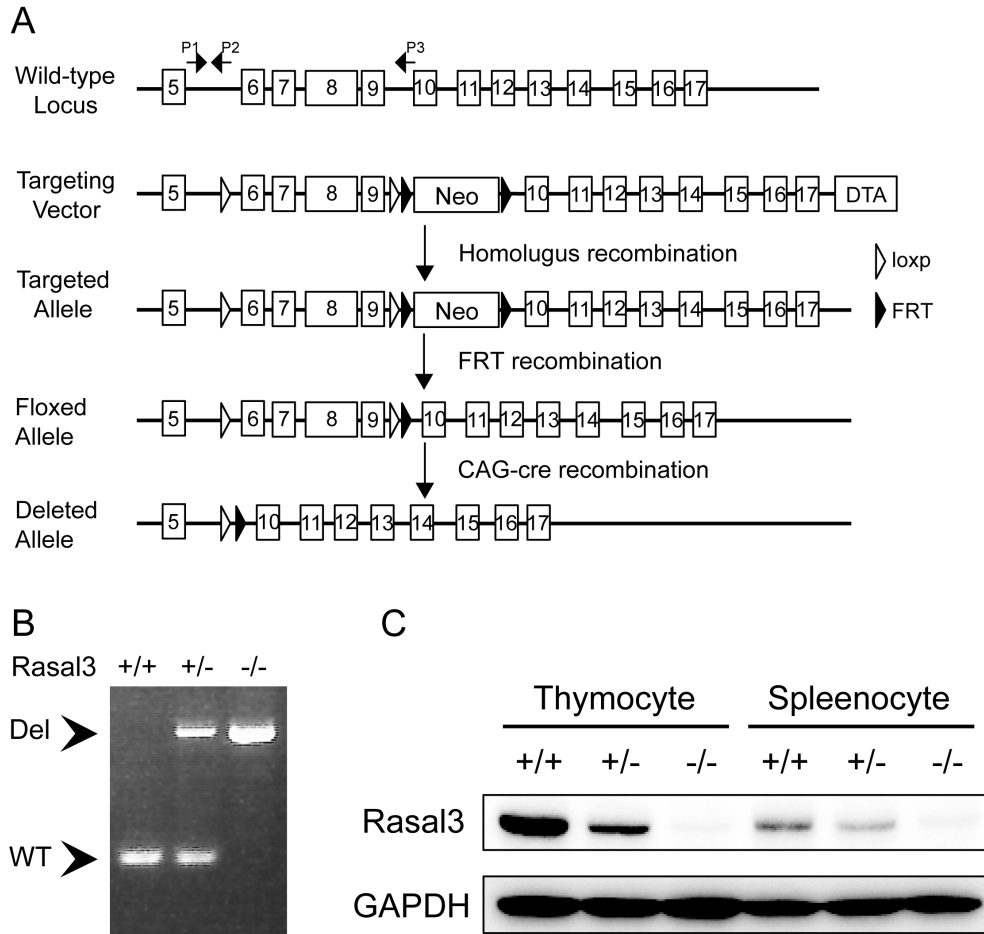

(A) Schematic diagram of Rasal3-deficient loci was shown. Generation of Rasal3-mice was described in Materials and Methods in detail. (B) Confirmation of Rasal3 deficiency by PCR. To detect mice genotypes, the following primers were used ; P1 TCTATTCTGCTTTATGCTAGGTGAAC, P2 ATCCTAGTGATTGATCCGCTATTTC, P3 CAATCAAGTTTGAGTGCCCTGC. (C) Confirmation of Rasal3 deficiency by Western blot.
