# Supplementary material for: The Ras GTPase-Activating Protein Rasal3 Supports Survival of Naive T Cells
Source: PubMed Central journal article supplement (PMC4368693; doi:10.1371/journal.pone.0119898), 2015-03-20
Supplement: pone.0119898.s003.pdf [file pone.0119898.s003.pdf]

(A), (B), (C) and (D) show cell number and frequency of thymic cell subpopulation in poly clonal TCR, OT-II TCR Tg, OT-I TCR Tg and HY TCR Tg mice, respectively.

All TCR Tgs were on a Rag<sup>-/-</sup> background.
