# Supplementary material for: The Ras GTPase-Activating Protein Rasal3 Supports Survival of Naive T Cells
Source: PubMed Central journal article supplement (PMC4368693; doi:10.1371/journal.pone.0119898), 2015-03-20
Supplement: pone.0119898.s004.pdf [file pone.0119898.s004.pdf]

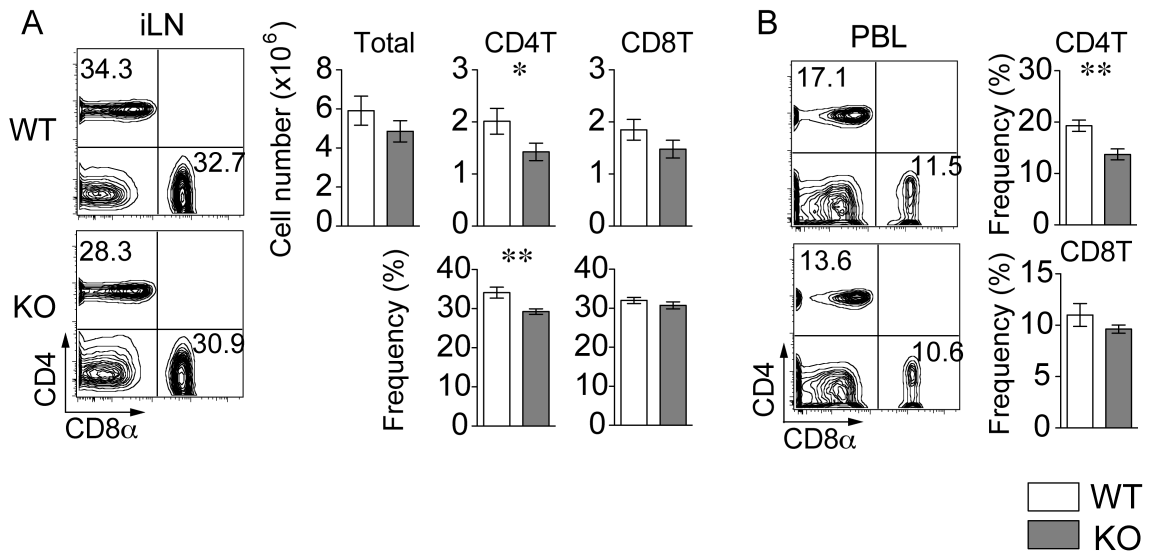

(A) CD4 and CD8 profile of inguinal lymph node cells from WT and Rasal3-KO mice.

(B) CD4 and CD8 profile of peripheral blood lymphocytes from WT and Rasal3-KO mice.
